# Supplementary material for: Using Visual Patient Heart to improve anaesthesia professionals’ ECG Interpretation and Arrhythmia Situation Awareness: A Quantitative Study
Source: Research Square preprint supplement (doi:10.21203/rs.3.rs-8410940/v1), 2026-01-20
Supplement: Supplementary file 1 [file 1b03960cb4182bb175901cff.docx]

# Supplementary Material to: **“*Using Visual Patient Heart to improve anaesthesia professionals’ ECG Interpretation and Arrhythmia Situation Awareness: A Quantitative Study*”**

# Cynthia A. Hunn†, Max Ebensperger†, Tadzio R. Roche, Arend Rahrisch, Achilles Delis, Florian Piekarski, Florian J. Raimann, Julia Braun, Sayeh Bagheri, Svenja Letz, Gregor Massoth, Kai Zacharowski, David W. Tscholl

# † These authors contributed equally to this publication

# *Corresponding author: **david.tscholl@usz.ch**

**
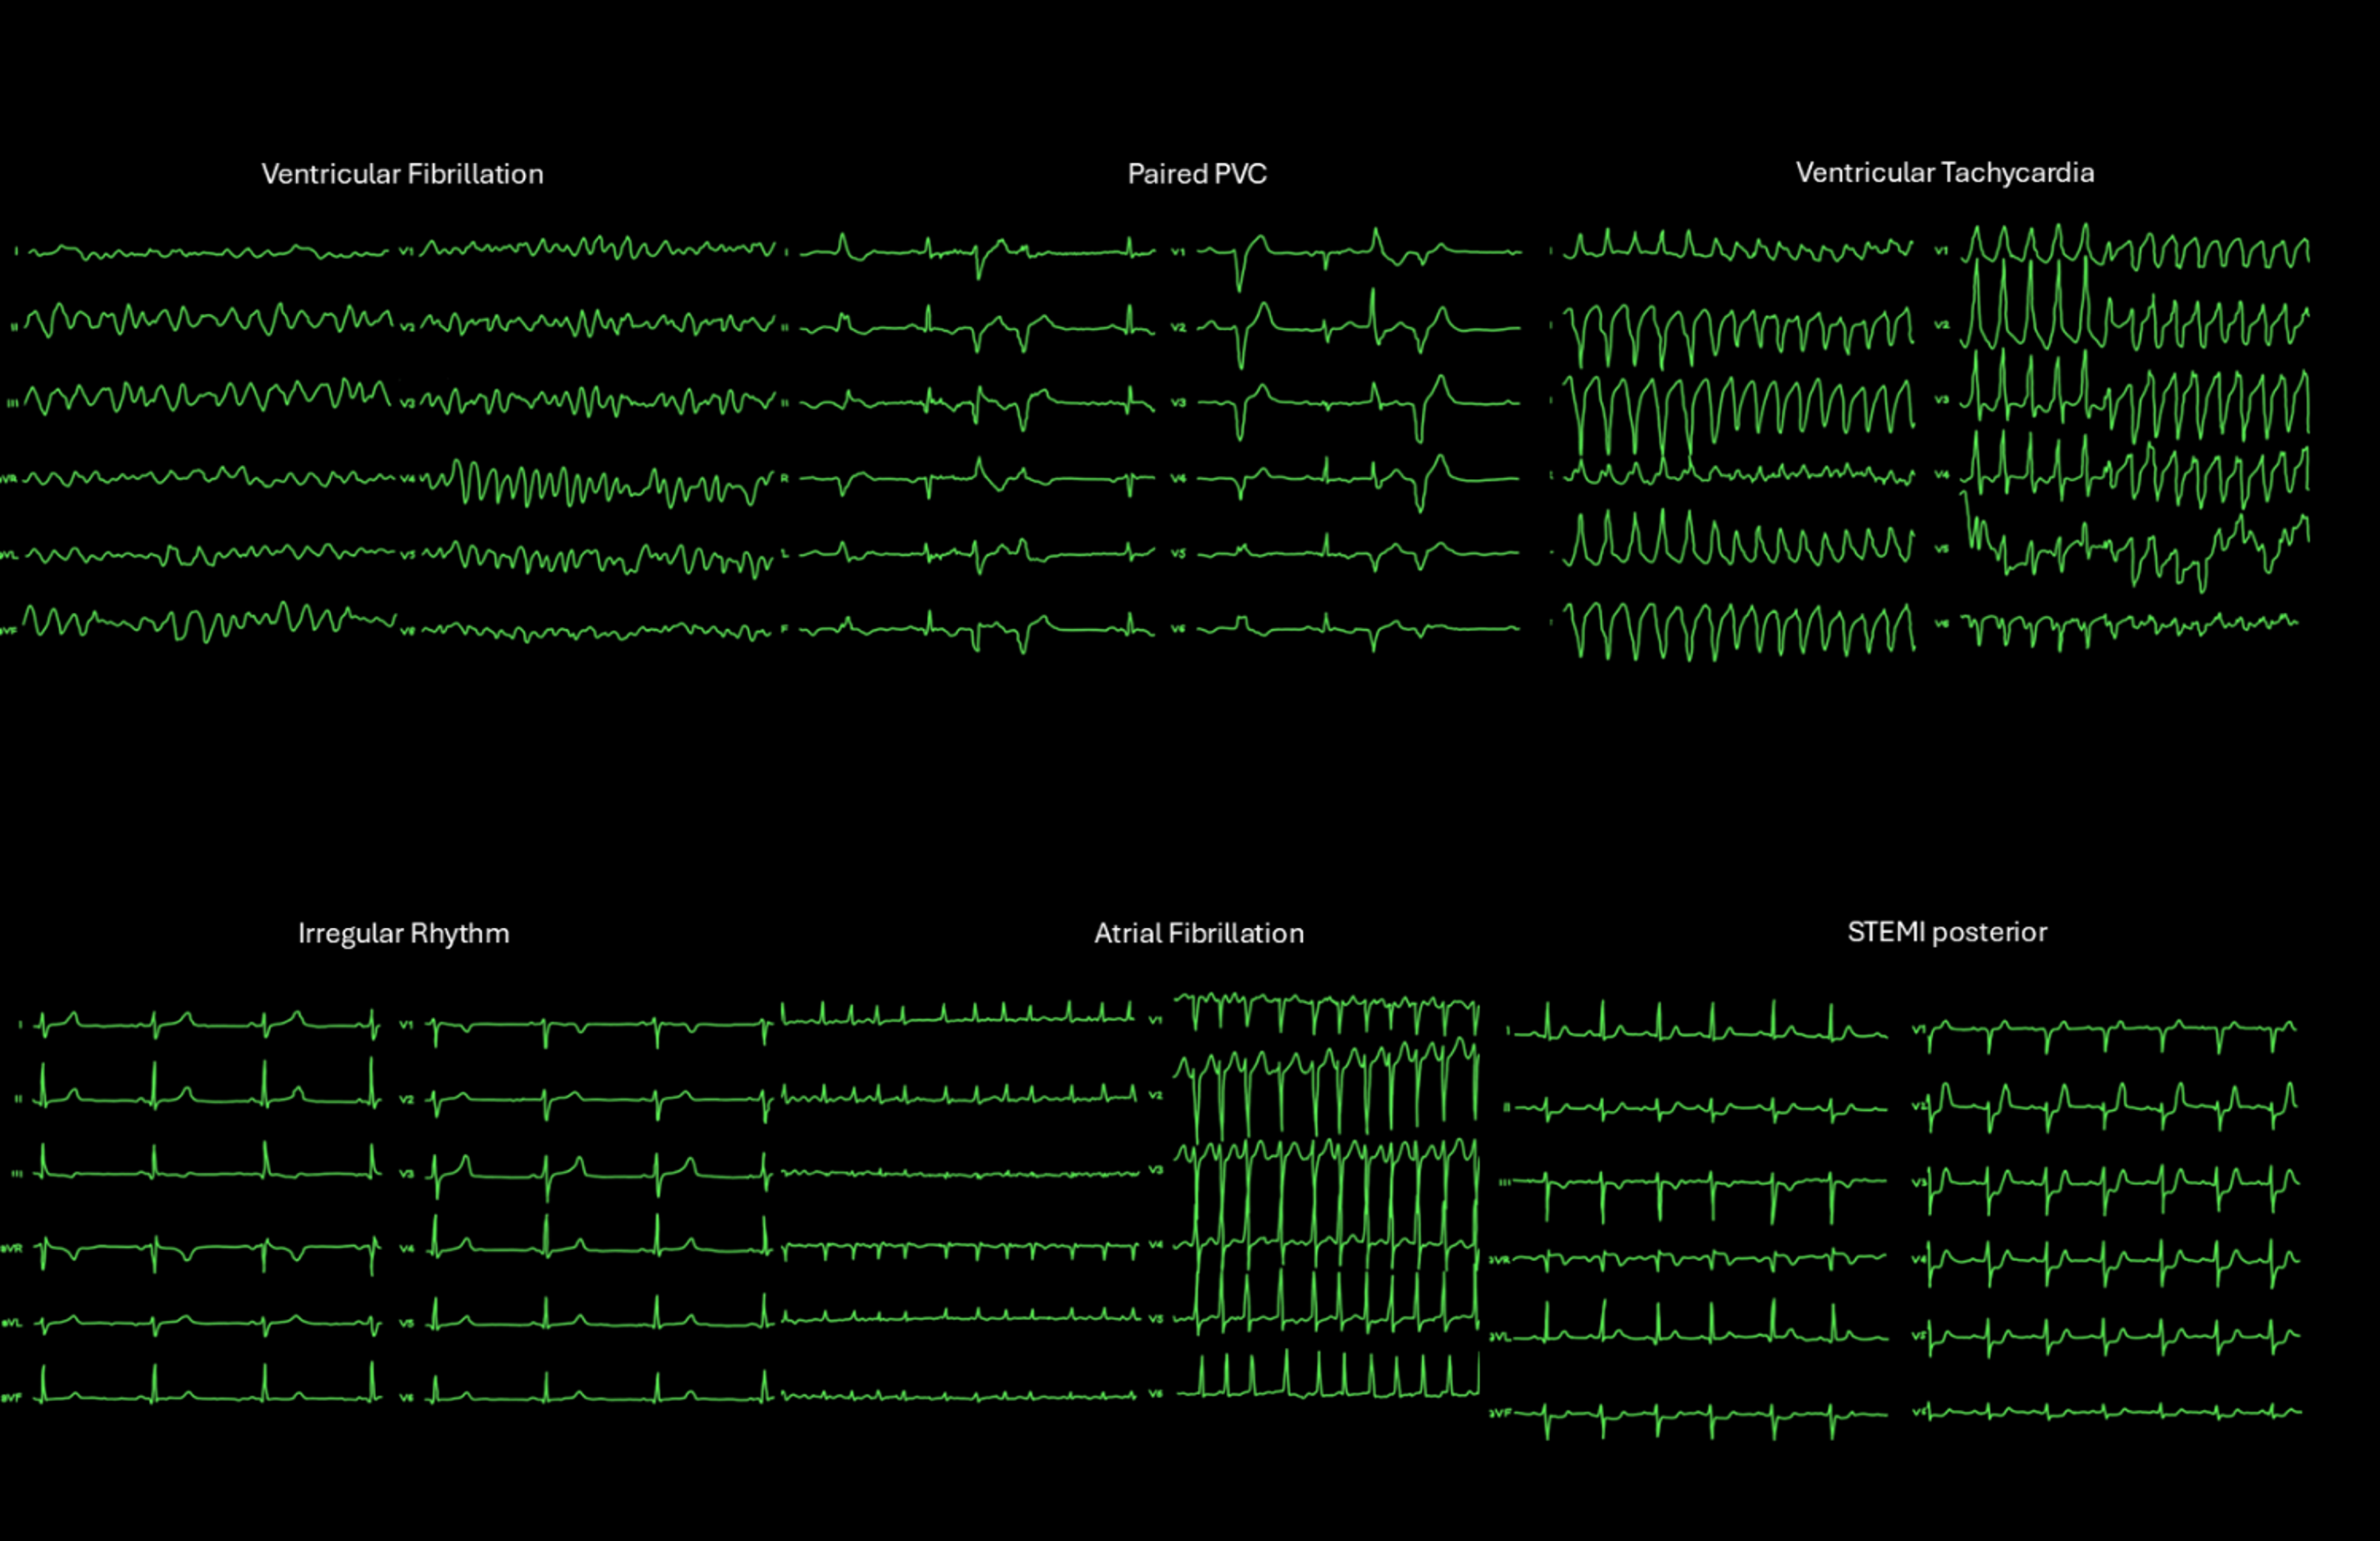
Supplementary Figure S1:** 12-lead ECG displays created with “*procreate”* software.

**
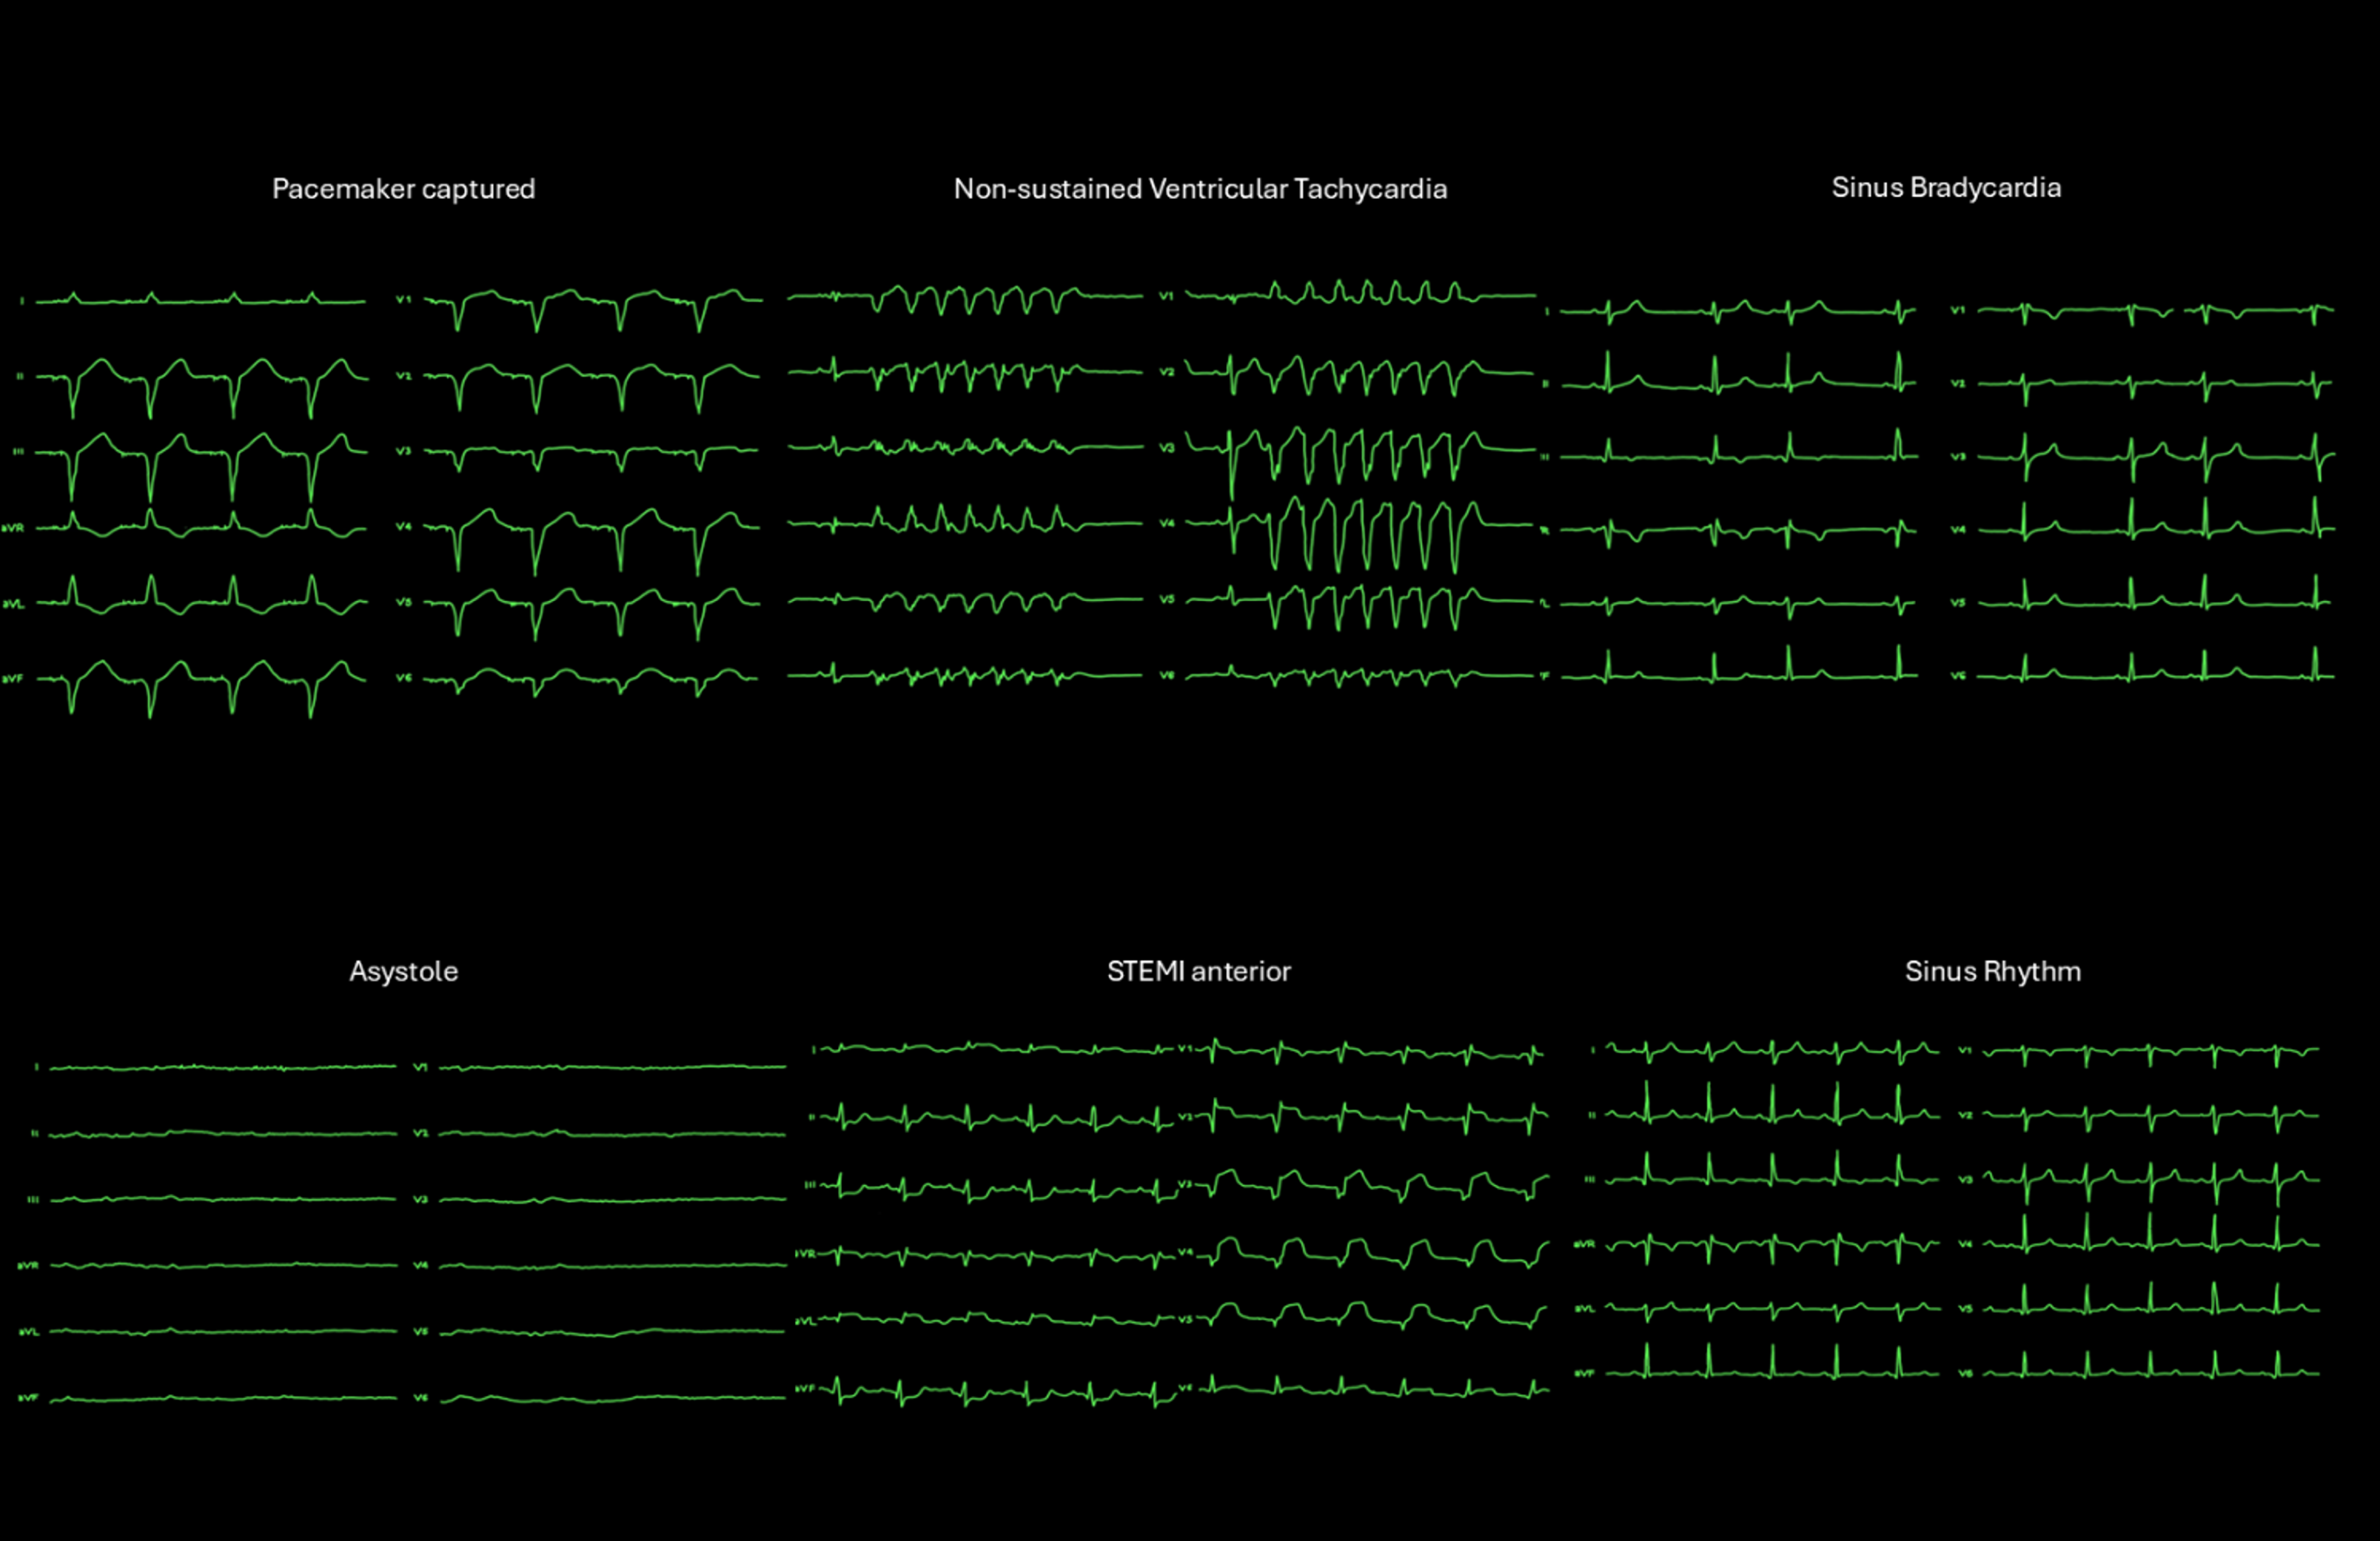
Supplementary Figure S2:** 12-lead ECG displays created with “*procreate”* software.

**
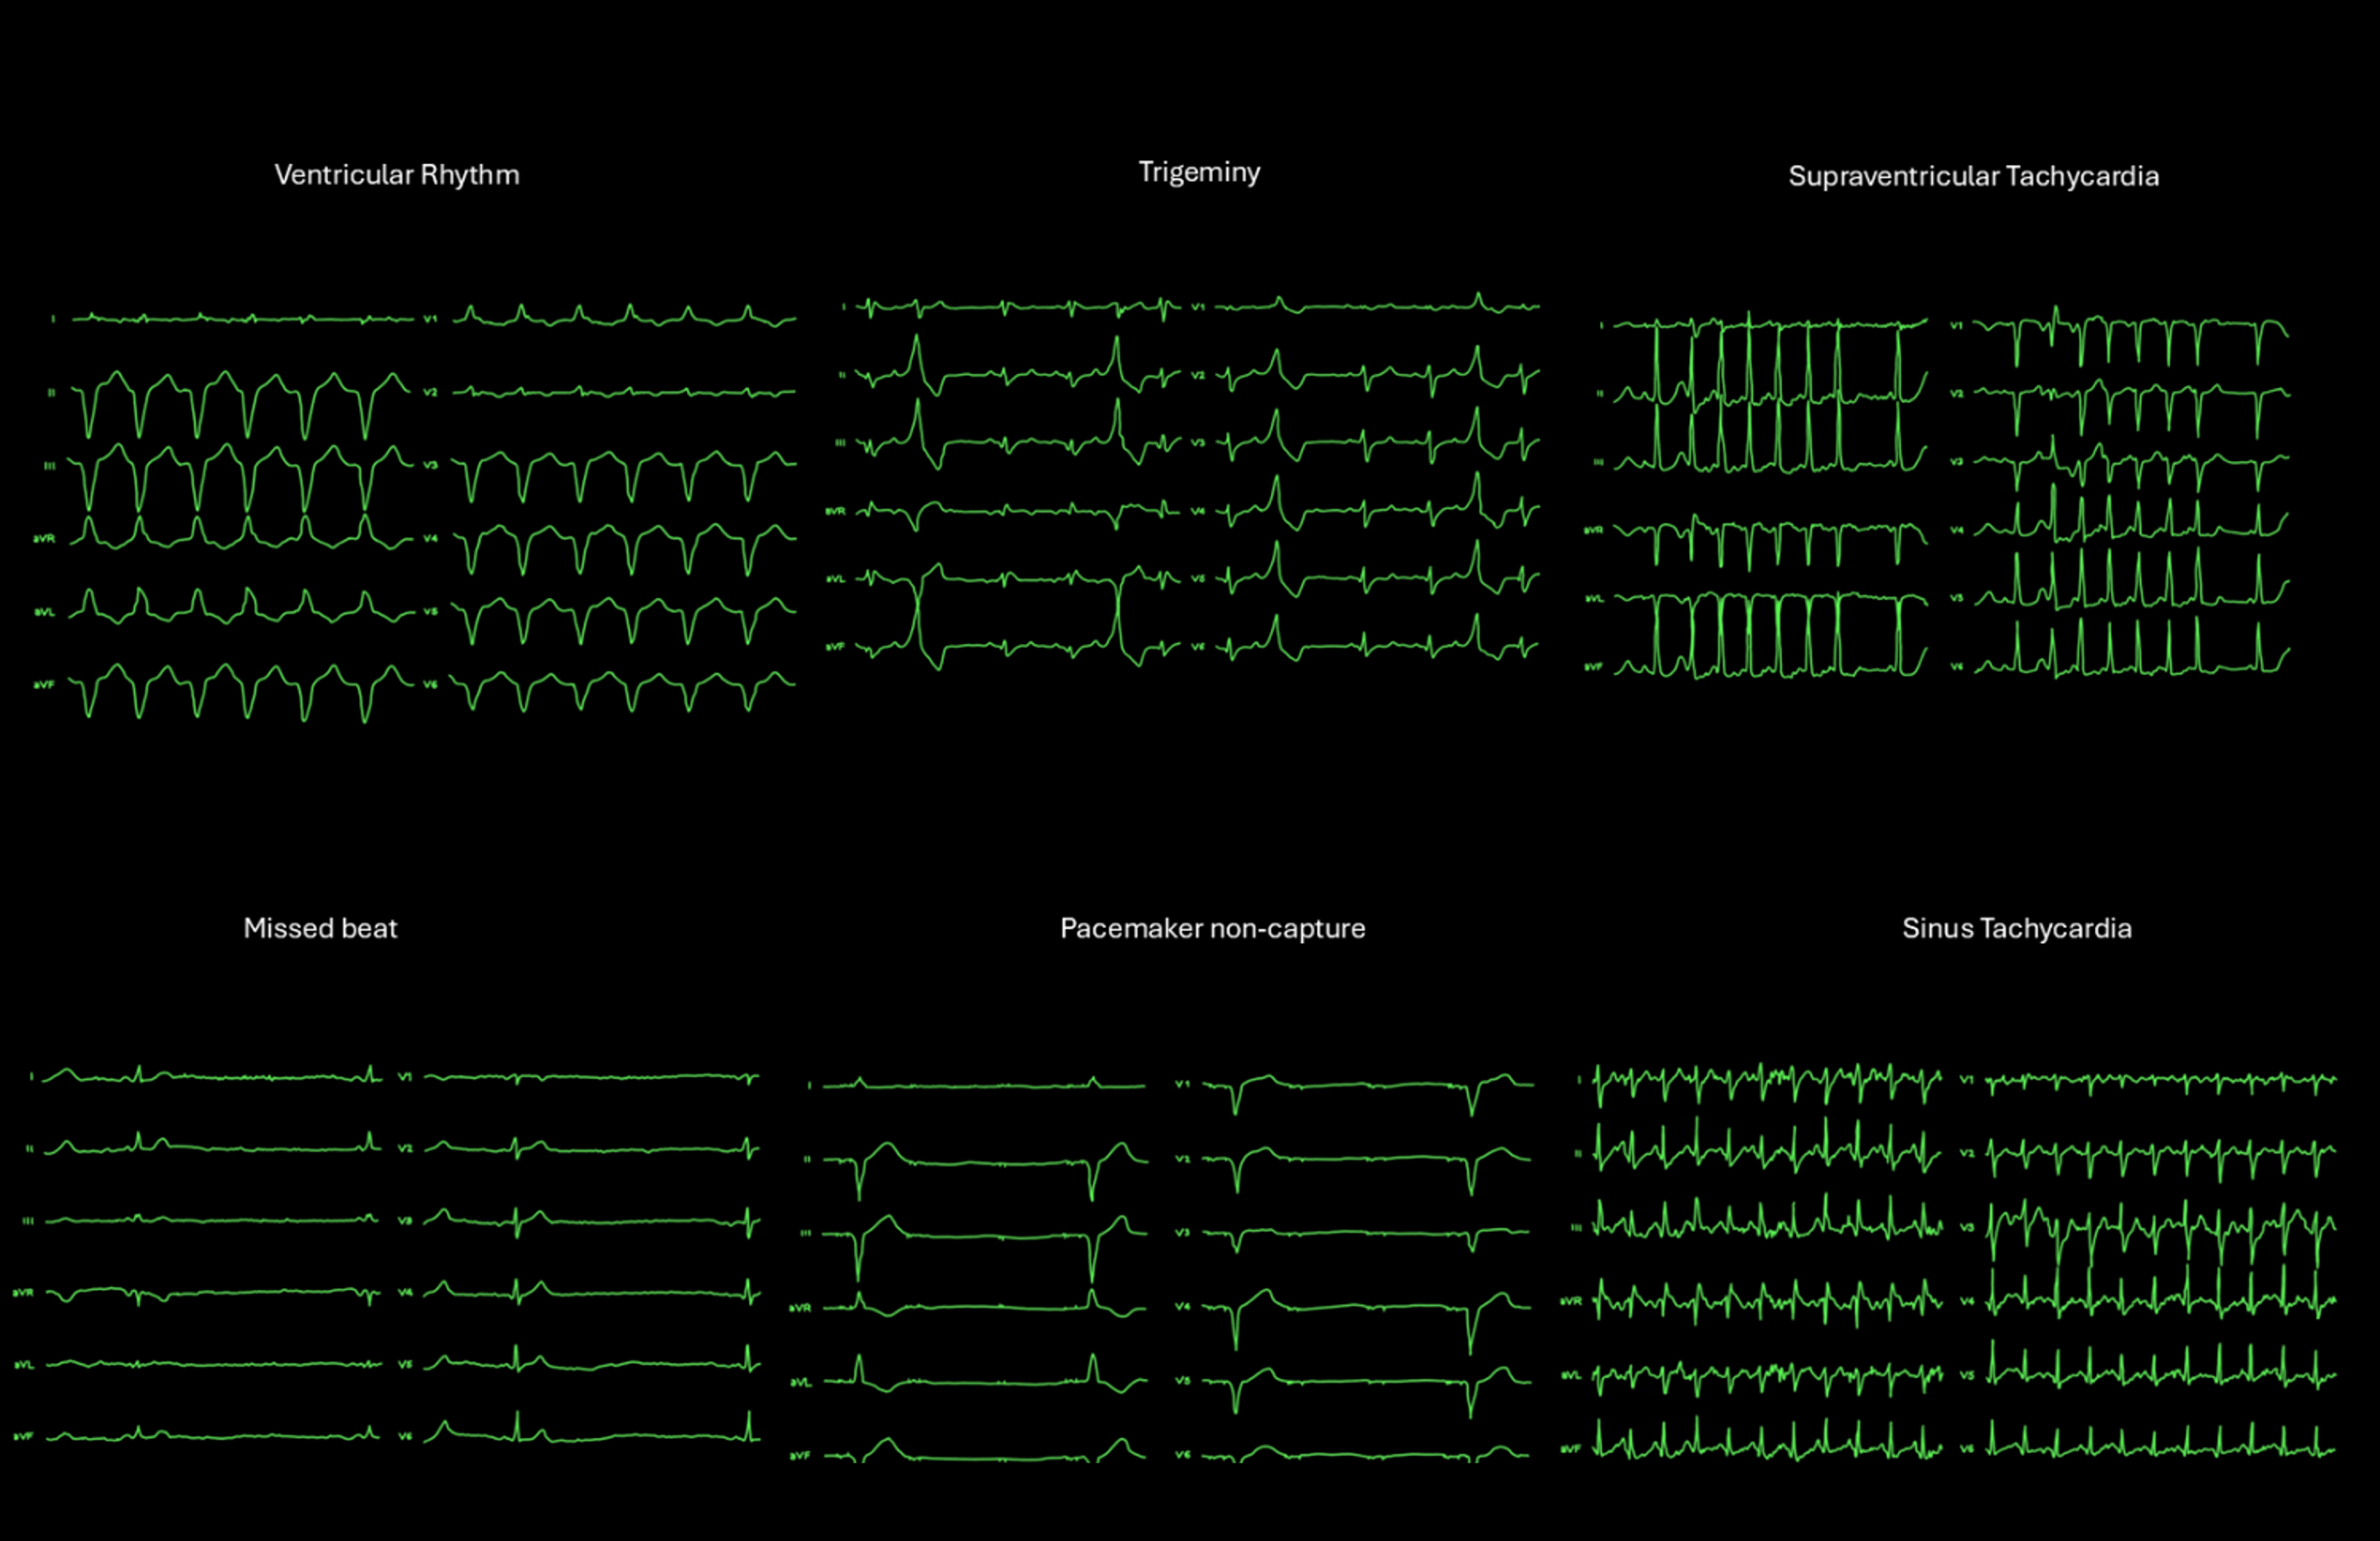
Supplementary Figure S3:** 12-lead ECG displays created with “*procreate”* software.


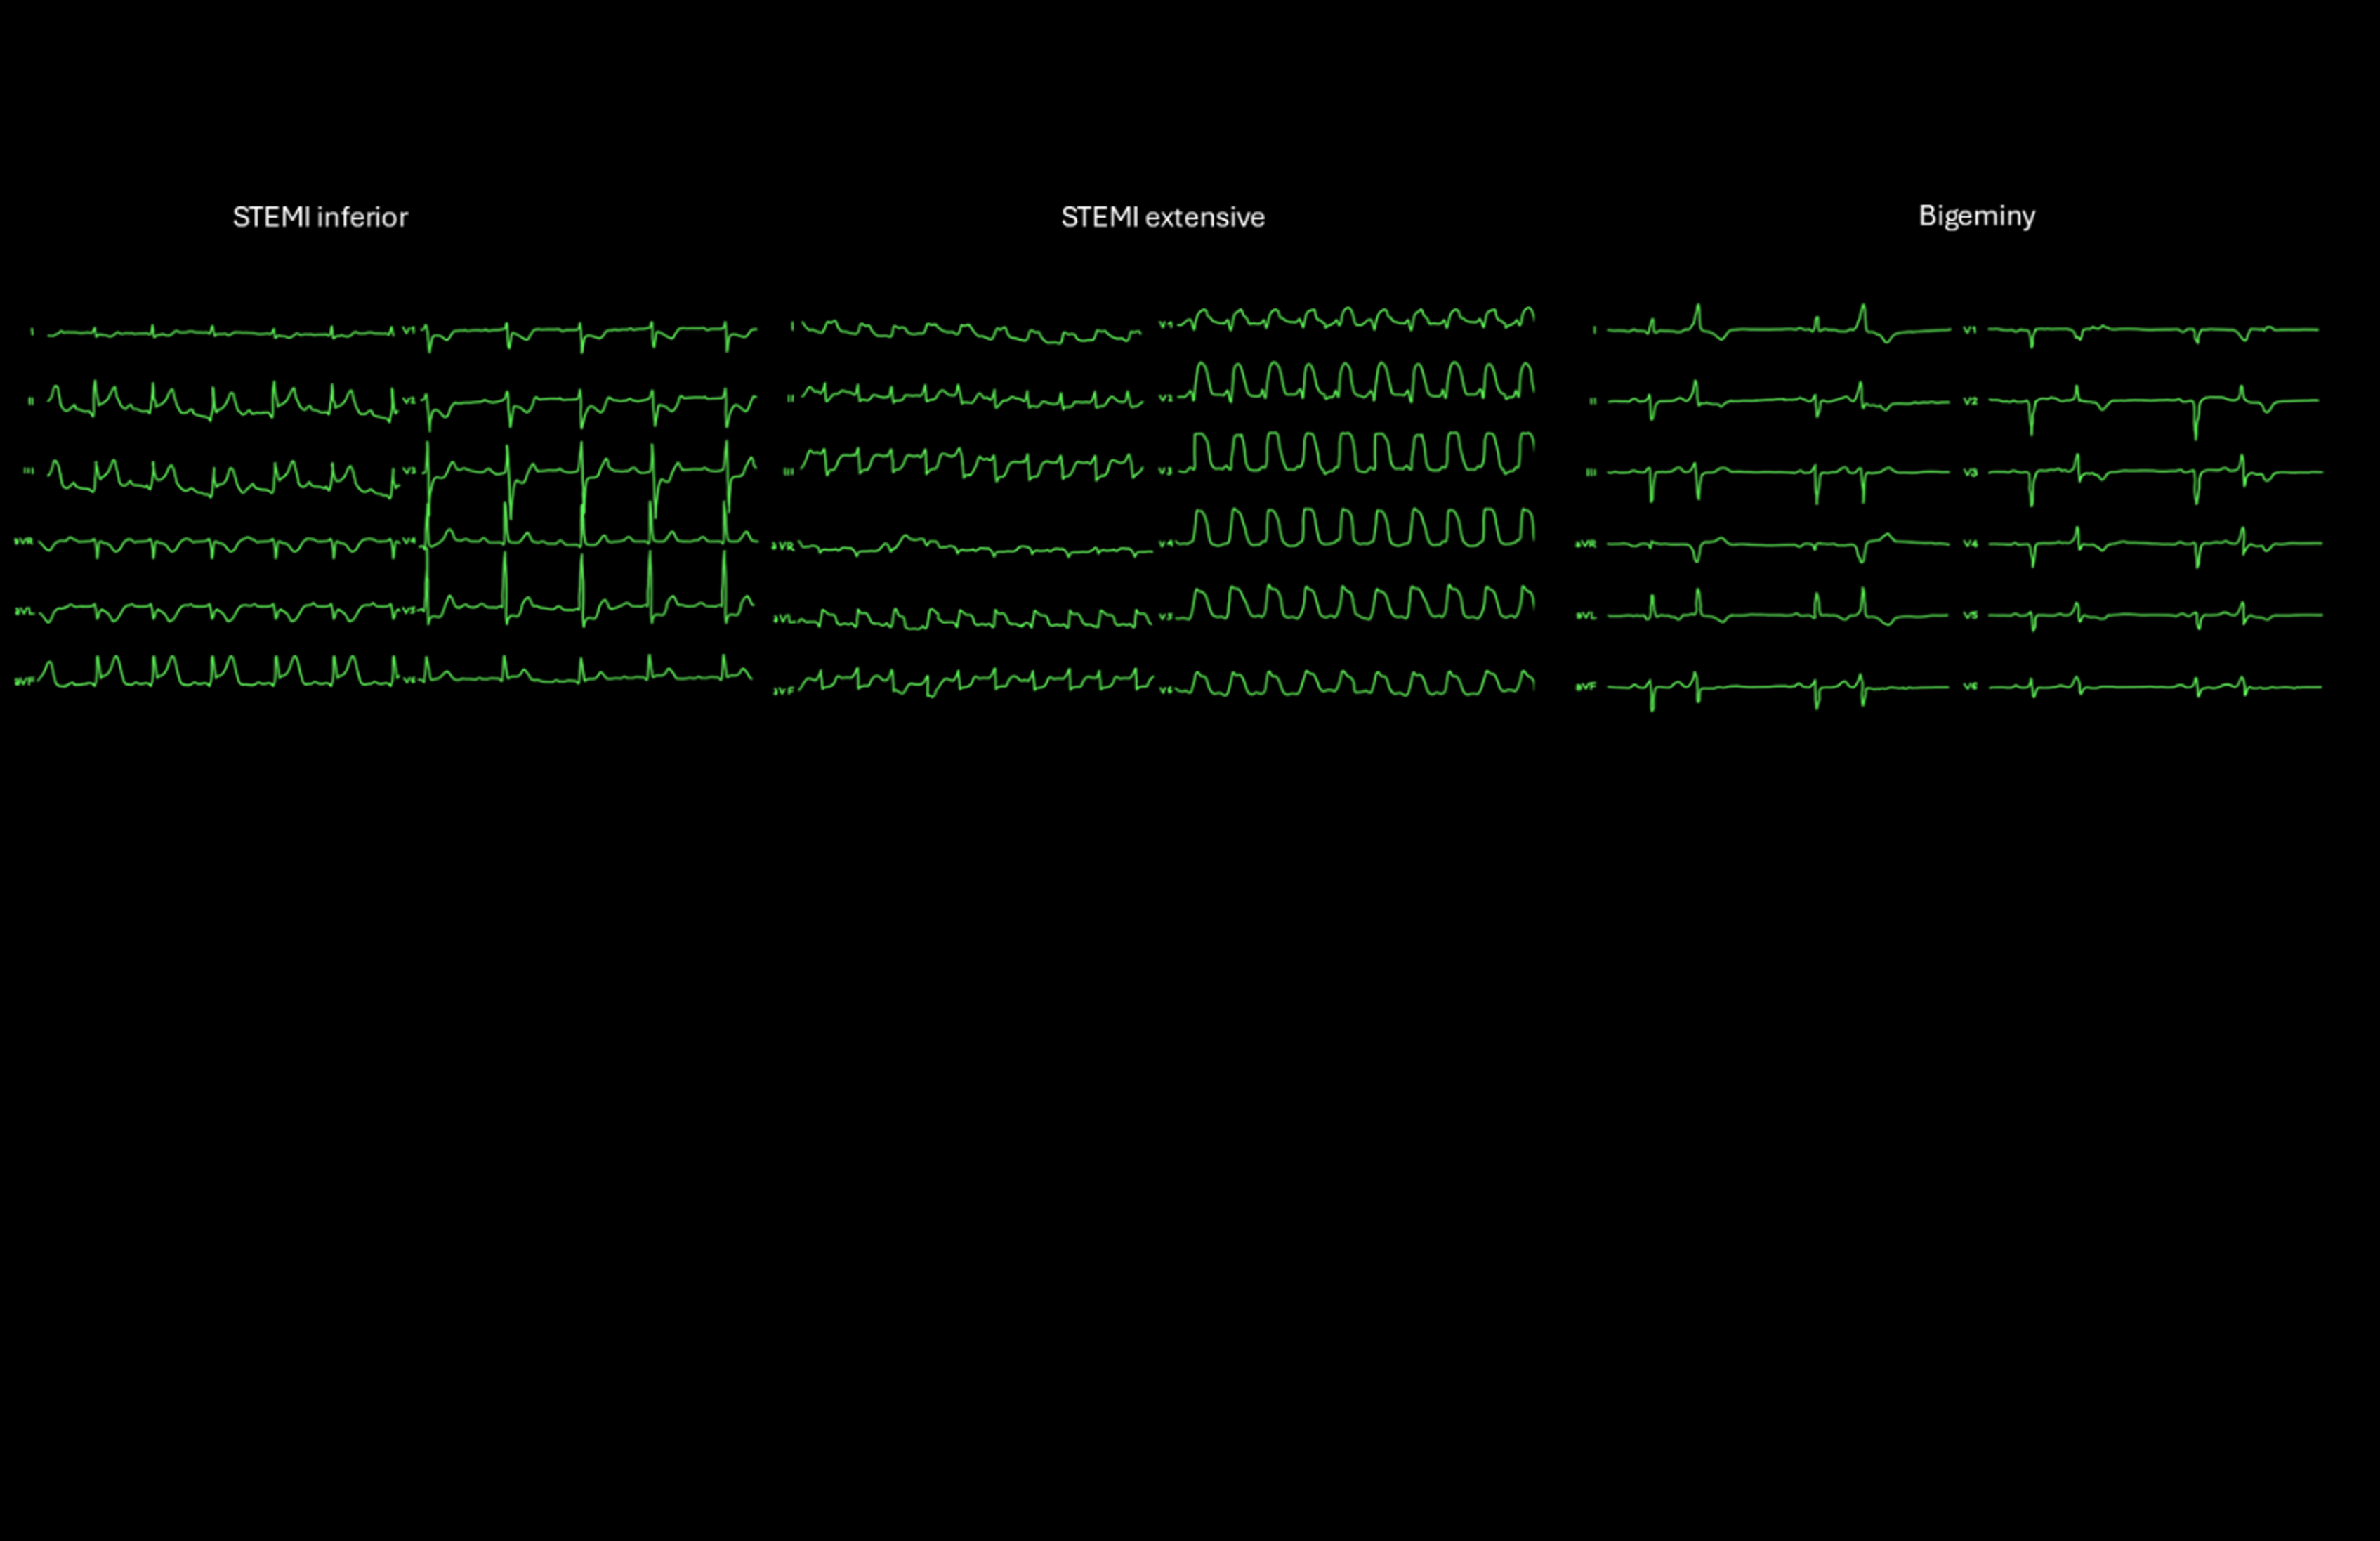


**Supplementary Figure S4:** 12-lead ECG displays created with “*procreate”* software.


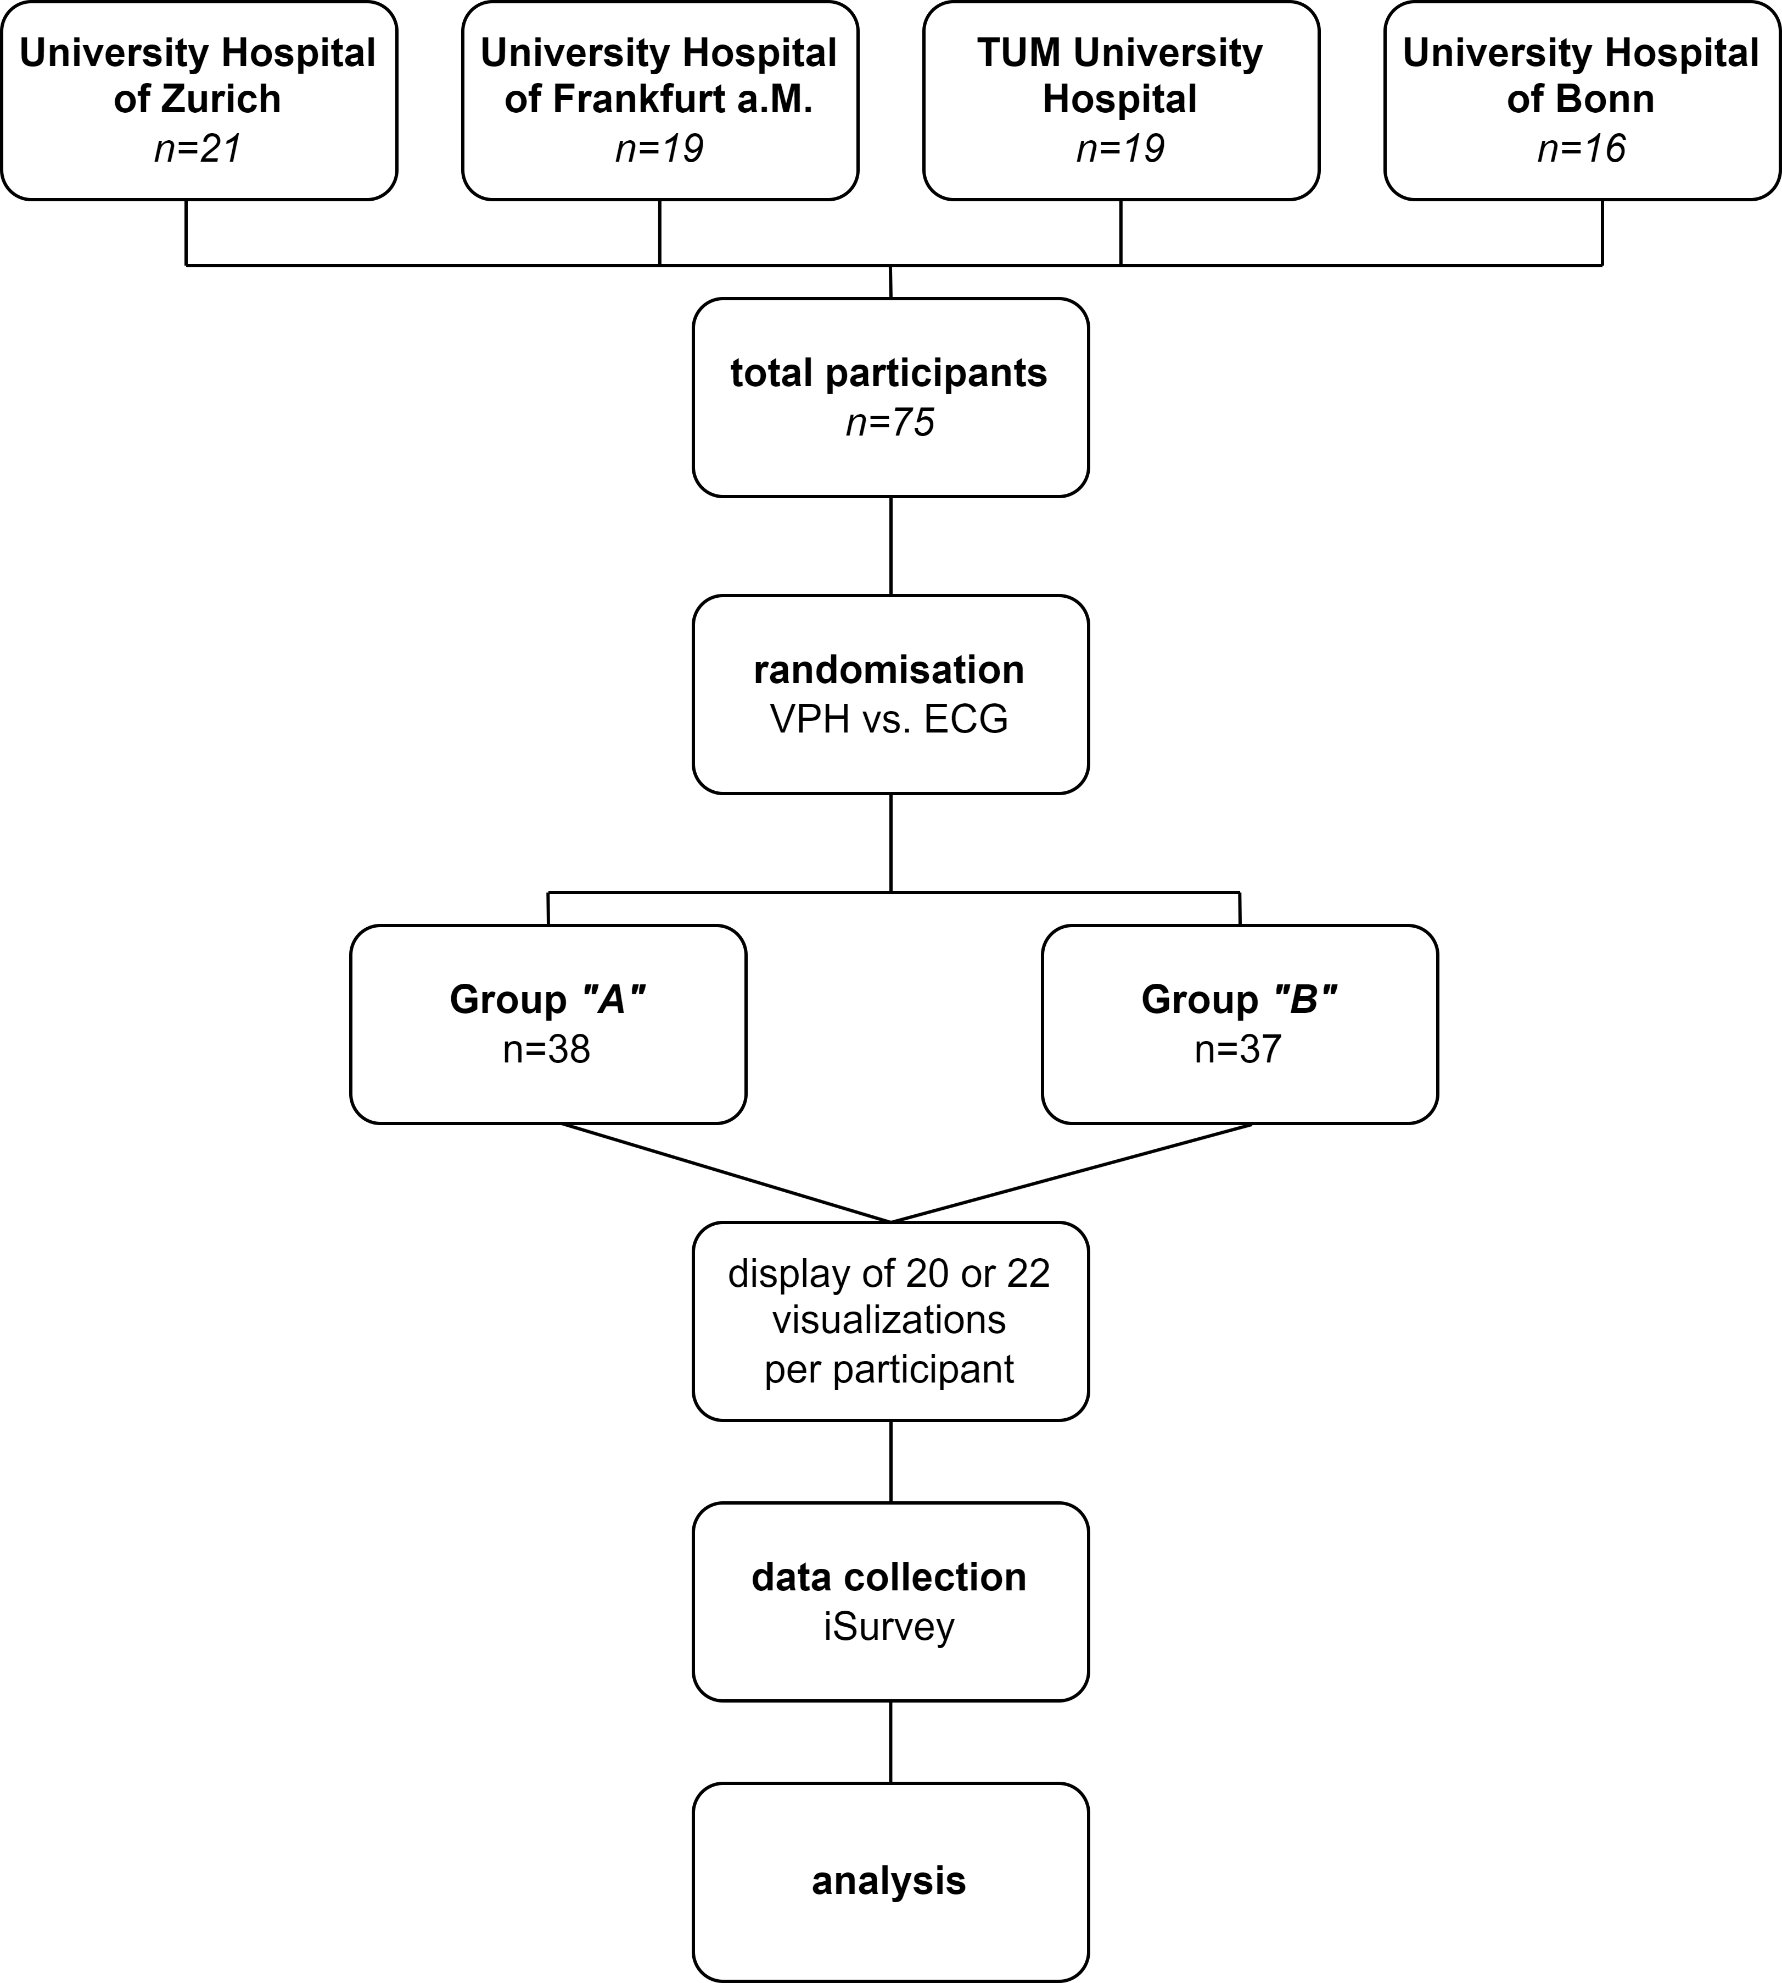


**Supplementary Figure S5:** Flowchart of Study design


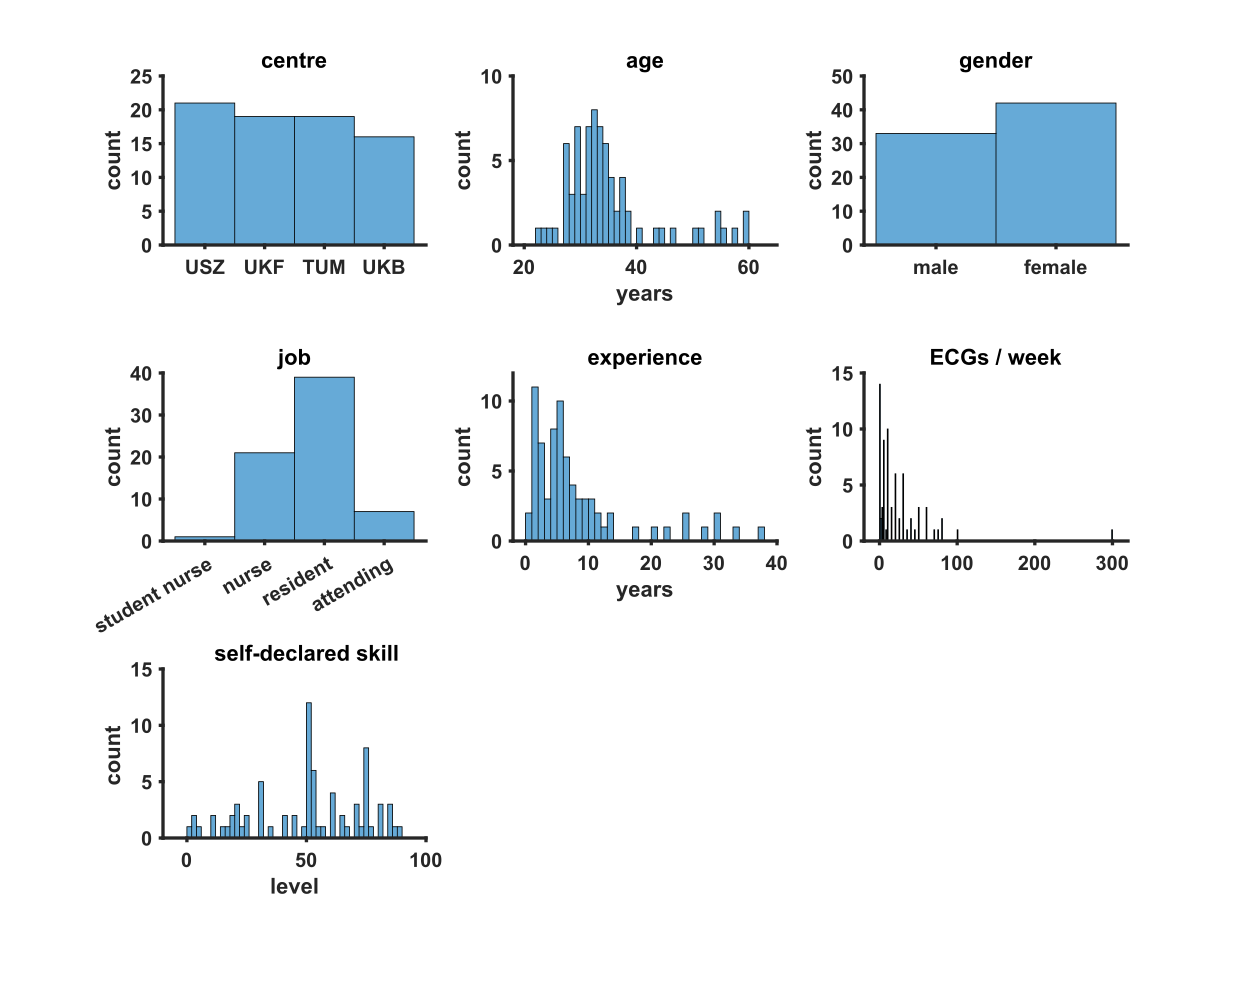


**Supplementary Figure S6:** Participants' demographics

| **Correctness (logistic)** | | | | |
| --- | --- | --- | --- | --- |
|  | **Odds Ratio** | **CI upper** | **CI lower** | **p-value** |
| Intercept | 0.87 | 0.62 | 1.2 | 0.39 |
| Modality: VPH | 6.06 | 4.79 | 7.66 | <0.001 |
| Order | 0.98 | 0.97 | 1 | 0.08 |
| ECG/week | 1 | 0.99 | 1 | 0.79 |
| **Confidence (linear)** | | | | |
|  | **Coefficient** | **CI upper** | **CI lower** | **p-value** |
| Intercept | 50.51 | 45.86 | 55.17 | <0.001 |
| Modality: VPH | 24.38 | 21.95 | 26.8 | <0.001 |
| Order | 0.23 | 0.004 | 0.42 | 0.002 |
| ECG/week | 0.06 | -0.02 | 0.15 | 0.15 |
| **NASA-TLX (linear)** | | | | |
|  | **Coefficient** | **CI upper** | **CI lower** | **p-value** |
| Intercept | 55.05 | 51.22 | 58.88 | <0.001 |
| Modality: VPH | -25.5 | -27.34 | -23.66 | <0.001 |
| Order | -0.11 | -0.25 | 0.03 | 0.14 |
| ECG/week | -0.06 | -0.13 | 0.001 | 0.13 |

**Supplementary Table 1:** Results of mixed logistic and linear models (CI: confidence interval)


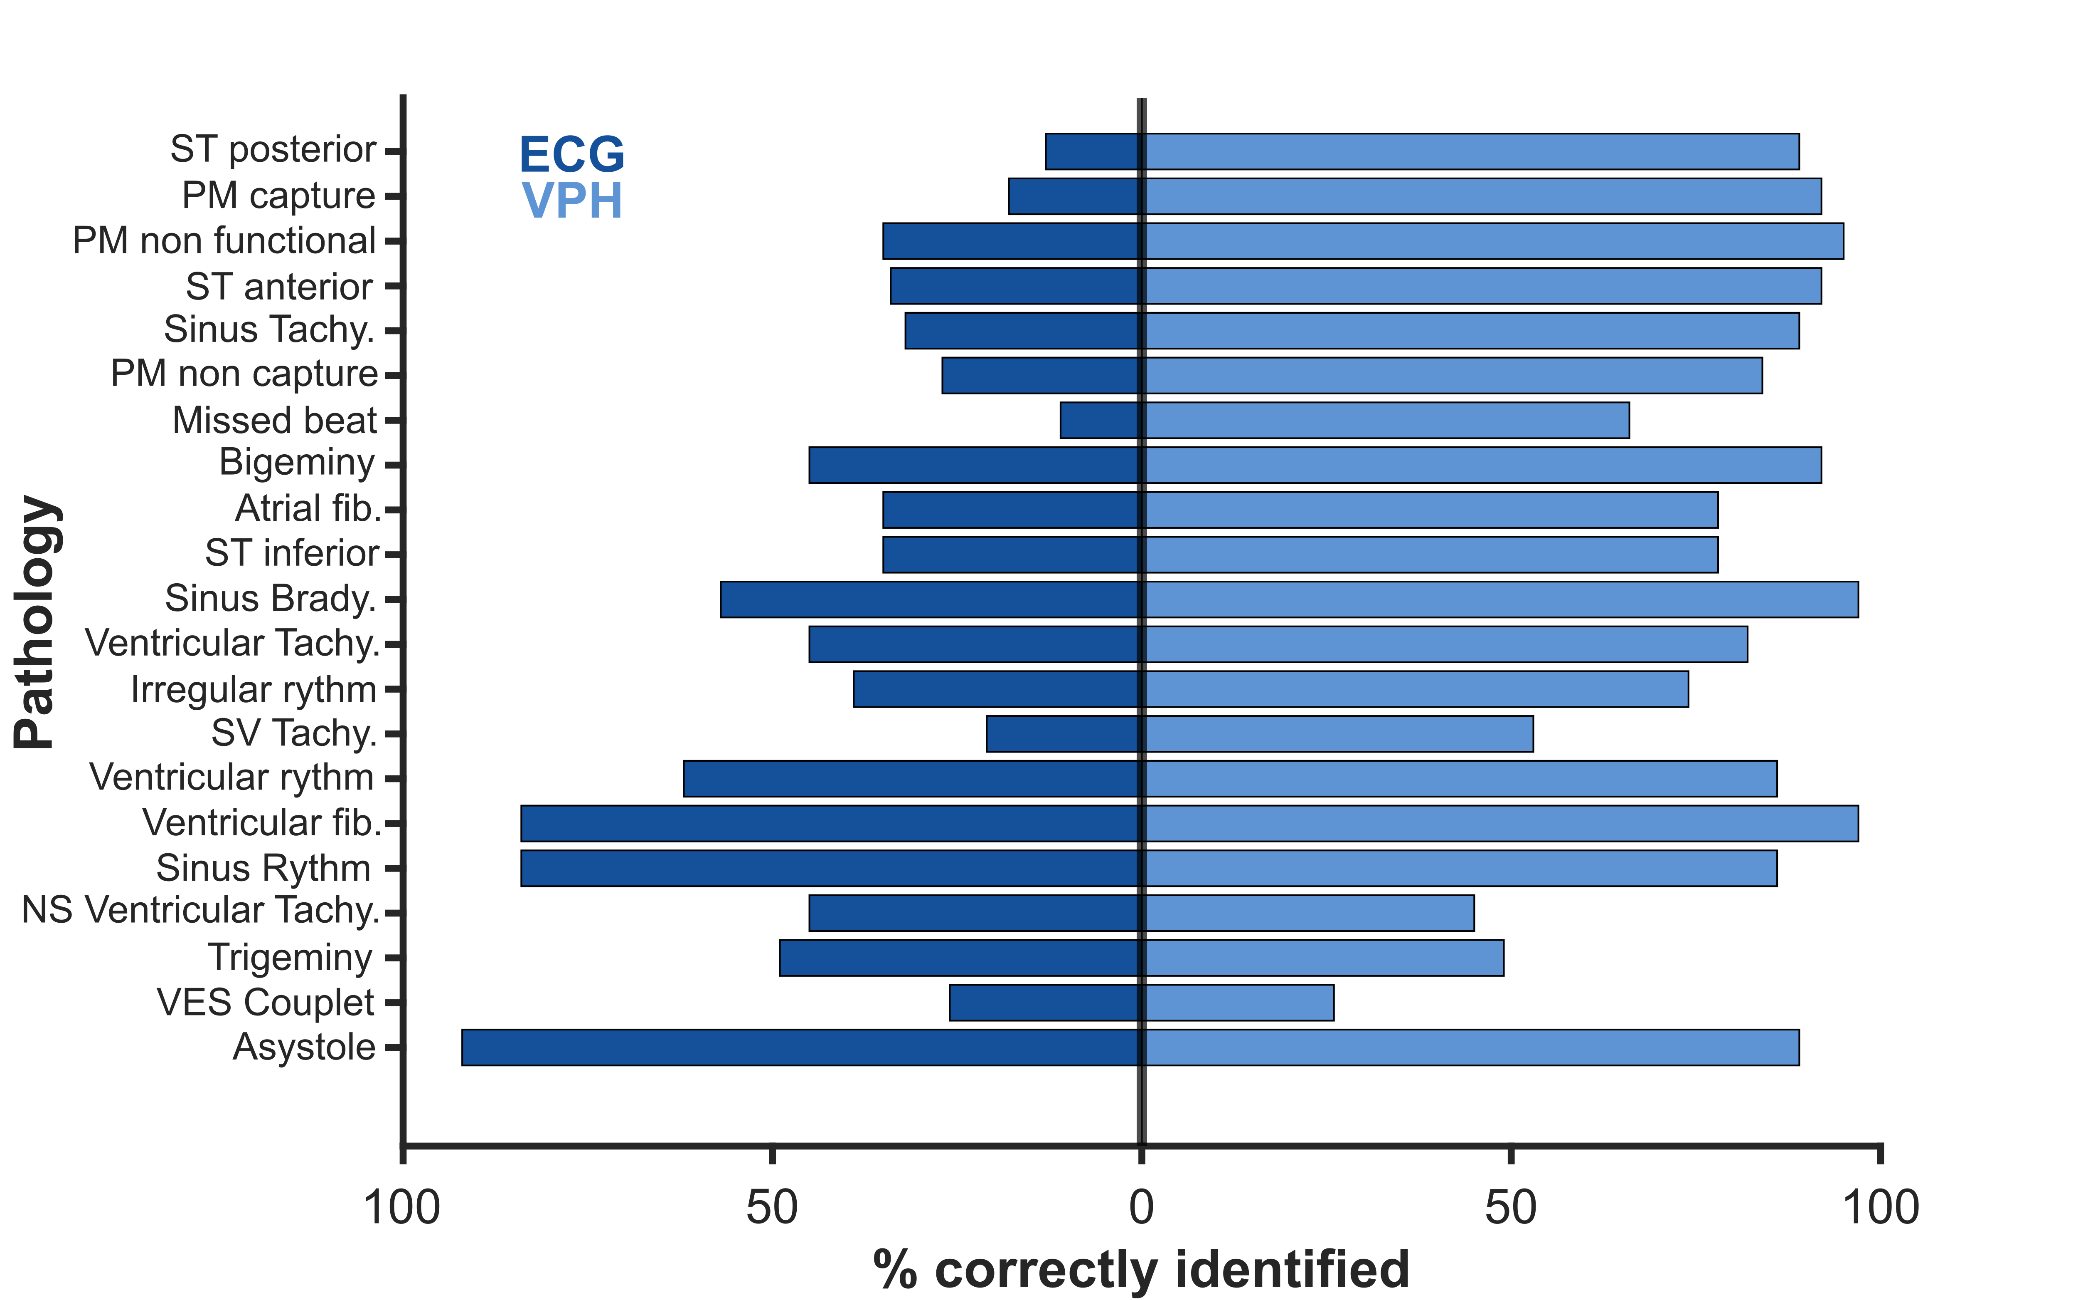


**Supplementary Figure S7:** Bar chart indicates the difference in percentage of correctly identified pathologies for Visual Patient Heart (VPH) minus 12-lead ECG.

The pathologies are ranked with descending differences in the percentages, i.e., the top pathology shows the highest superiority for correctness of VPH.

**
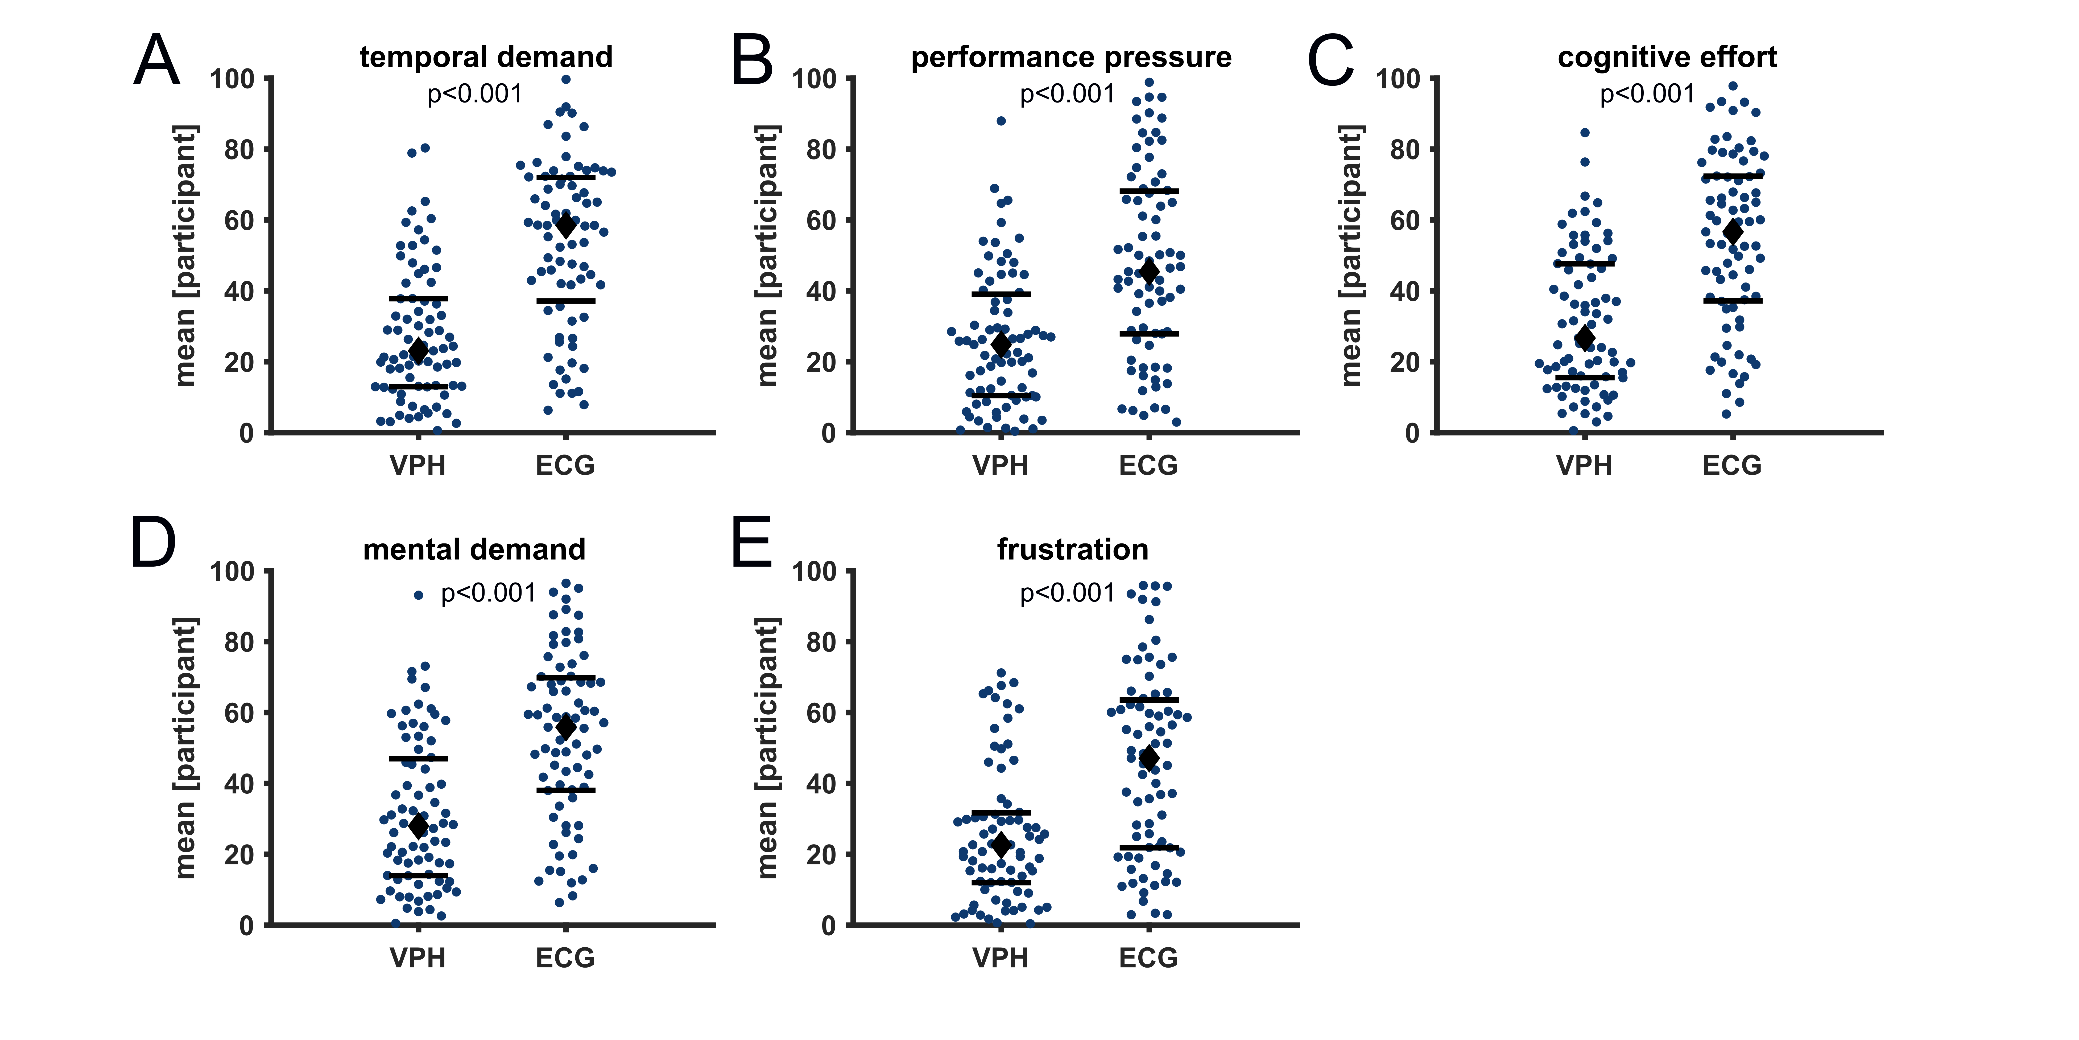
**

**Supplementary Figure S8:** Scatter Plots of secondary outcomes of the NASA-TLX questionnaire.
